# Supplementary material
Source: Springer Nature journal article supplement (https://www.springermedizin.de/resource/supplementary/12876_2012_878_MOESM4_ESM.pdf/9437588)

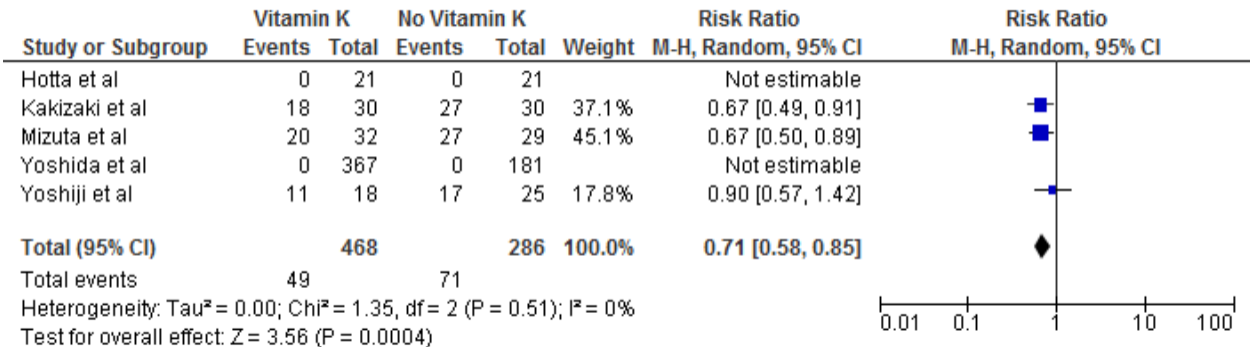

Supplement: MOESM4 [file 9437588]
